# Supplementary material for: Long non-coding RNA expression profiles predict clinical phenotypes of seminoma and yolk sac tumor
Source: Royal Society of Chemistry journal article supplement (doi:10.1039/c7ra12131h), 2017-01-01
Supplement: c7ra12131h1.pdf [file c7ra12131h1.pdf]

## Table S1 lncRNAs Represented on the Affymetrix Human Genome

### U133A Array Based on the Annotation of Refseq and Ensembl

| No. Probesets  | Refseq Transcript ID | Gene Symbol | Ensembl Gene ID     | Ensembl Gene Symbol     |
|----------------|----------------------|-------------|---------------------|-------------------------|
| 1 179_at       | NR_023383            | PMS2L1      |                     |                         |
| 2 201451_x_at  |                      |             | ENSG00000272430     | AL356056.3              |
| 3 202496_at    |                      |             | ENSG00000263126     | AC040162.3              |
| 4 203107_x_at  |                      |             | ENSG00000235979     | AC004448.4              |
| 5 203245_s_at  | NR_015427            | NCRNA00094  |                     |                         |
| 6 203483_at    |                      |             | ENSG00000273476     | AL133215.3              |
| 7 203940_s_at  |                      |             | ENSG00000258610     | AF111169.2              |
| 8 204794_at    |                      |             | ENSG00000228873     | AC012307.1              |
| 9 205077_s_at  |                      |             | ENSG00000273073     | AC073869.3              |
| 10 205510_s_at | NR_026891            | FLJ10038    |                     |                         |
| 11 205511_at   | NR_026891            | FLJ10038    |                     |                         |
| 12 205518_s_at | NR_002174            | CMAH        |                     |                         |
| 13 205677_s_at | NR_002605            | DLEU1       | ENSG00000176124     | DLEU1                   |
| 14 205833_s_at | NR_024617            | PART1       | ENSG00000152931     | PART1                   |
| 15 205834_s_at | NR_024617            | PART1       | ENSG00000152931     | PART1                   |
| 16 206021_at   | NR_003654            | SCAND2      |                     |                         |
| 17 206478_at   | NR_026800            | KIAA0125    | ENSG00000226777 /// | FAM30A                  |
| 18 206557_at   | NR_003578            | ZNF702P     |                     |                         |
| 19 206611_at   |                      |             | ENSG00000274362 /// | AC226740.1 /// C2orf27B |
| 20 206685_at   | NR_002139            | HCG4        |                     |                         |
| 21 206808_at   | NR_002726            | HNRNPA3P1   |                     |                         |
| 22 206819_at   | NR_003714            | POM121L9P   | ENSG00000197210     | AP000550.1              |
| 23 206824_at   | NR_003276            | CES4        |                     |                         |
| 24 206954_at   | NR_023920            | WIT1        |                     |                         |
| 25 207028_at   | NR_026766            | MYCNOS      |                     |                         |
| 26 207063_at   | NR_001544            | NCRNA00185  | ENSG00000176728     | TTY14                   |
| 27 207078_at   |                      |             | ENSG00000259115     | AL357153.3              |
| 28 207079_s_at |                      |             | ENSG00000259115     | AL357153.3              |
| 29 207161_at   | NR_022006            | KIAA0087    | ENSG00000122548     | KIAA0087                |
| 30 207215_at   | NR_003081            | GSTTP1      |                     |                         |
| 31 207241_at   |                      |             | ENSG00000082929     | LINC01587               |
| 32 207252_at   | NR_024616            | INE1        |                     |                         |
| 33 207259_at   | NR_024626            | C17orf73    | ENSG00000167117     | LINC00483               |
| 34 207283_at   | NR_002229            | RPL23AP32   |                     |                         |
| 35 207287_at   | NR_027715            | FLJ14107    |                     |                         |

|    |             |           |            |                     |            |
|----|-------------|-----------|------------|---------------------|------------|
| 36 | 207288_at   | NR_026710 | NCRNA00105 |                     |            |
| 37 | 207377_at   | NR_002191 | PPP1R2P9   |                     |            |
| 38 | 207394_at   | NR_023311 | ZNF137     |                     |            |
| 39 | 207412_x_at | NR_001275 | CELP       |                     |            |
| 40 | 207458_at   | NR_026785 | C8orf51    |                     |            |
| 41 | 207490_at   | NR_003063 | TUBA4B     |                     |            |
| 42 | 207582_at   | NR_023916 | PIN1L      |                     |            |
| 43 | 207631_at   | NR_003108 | NBR2       |                     |            |
| 44 | 207698_at   | NR_026773 | C6orf123   | ENSG00000146521     | LINC01558  |
| 45 | 207701_at   |           |            | ENSG00000128254     | C22orf24   |
| 46 | 207775_at   |           |            | ENSG00000283117     | MGC4859    |
| 47 | 207778_at   | NR_002714 | REG1P      |                     |            |
| 48 | 207894_s_at |           |            | ENSG00000187621     | TCL6       |
| 49 | 207963_at   |           |            | ENSG00000229921     | KIF25-AS1  |
| 50 | 208109_s_at | NR_026813 | C15orf5    |                     |            |
| 51 | 208136_s_at | NR_024166 | MGC3771    |                     |            |
| 52 | 208158_s_at |           |            | ENSG00000265750     | AC090772.3 |
| 53 | 208245_at   | NR_000039 | RAB9P1     |                     |            |
| 54 | 208246_x_at |           |            | ENSG00000261519     | AC010542.4 |
| 55 | 208247_at   | NR_024615 | C3orf51    |                     |            |
| 56 | 208287_at   |           |            | ENSG00000204625     | HCG9       |
| 57 | 208346_at   | NR_026769 | PPBPL2     |                     |            |
| 58 | 208440_at   |           |            | ENSG00000198685     | LINC01565  |
| 59 | 208493_at   |           |            | ENSG00000253508     | AC004080.2 |
| 60 | 208511_at   | NR_002734 | PTTG3P     |                     |            |
| 61 | 208529_at   | NR_026983 | BTF3L1     |                     |            |
| 62 | 208816_x_at | NR_003573 | ANXA2P2    |                     |            |
| 63 | 209917_s_at | NR_015381 | TP53TG1    | ENSG00000182165     | TP53TG1    |
| 64 | 210109_at   |           |            | ENSG00000279078     | SND1-IT1   |
| 65 | 210241_s_at | NR_015381 | TP53TG1    | ENSG00000182165     | TP53TG1    |
| 66 | 210272_at   | NR_001278 | CYP2B7P1   |                     |            |
| 67 | 210409_at   |           |            | ENSG00000198221     | AFDN-AS1   |
| 68 | 210444_at   | NR_002713 | NPY6R      |                     |            |
| 69 | 210464_at   | NR_026772 | C8orf71    | ENSG00000215117 /// | LINC00588  |
| 70 | 210496_at   | NR_002568 | NAG18      |                     |            |
| 71 | 210571_s_at | NR_002174 | CMAH       |                     |            |
| 72 | 210589_s_at | NR_002188 | GBAP1      |                     |            |
| 73 | 210679_x_at |           |            | ENSG00000255856     | AC069503.1 |
| 74 | 210707_x_at | NR_023383 | PMS2L11    |                     |            |
| 75 | 210794_s_at | NR_002766 | MEG3       | ENSG00000214548     | MEG3       |
| 76 | 210822_at   | NR_002803 | RPL13P5    |                     |            |

|     |             |           |               |                     |                |
|-----|-------------|-----------|---------------|---------------------|----------------|
| 77  | 210876_at   | NR_001562 | ANXA2P1       |                     |                |
| 78  | 210886_x_at | NR_015381 | TP53TG1       | ENSG00000182165     | TP53TG1        |
| 79  | 210911_at   | NR_026582 | ID2B          |                     |                |
| 80  | 210990_s_at |           |               | ENSG00000270661     | Z99289.2       |
| 81  | 211009_s_at | NR_024565 | ZNF271        |                     |                |
| 82  | 211038_s_at | NR_026752 | CROCCL1       |                     |                |
| 83  | 211050_x_at |           |               | ENSG00000282518 /// | AC240565.4 /// |
| 84  | 211074_at   |           |               | ENSG00000280800 /// | FP671120.3 /// |
| 85  | 211111_at   |           |               | ENSG00000235994     | AL049698.1     |
| 86  | 211241_at   | NR_001446 | ANXA2P3       |                     |                |
| 87  | 211350_s_at |           |               | ENSG00000229921     | KIF25-AS1      |
| 88  | 211351_at   |           |               | ENSG00000229921     | KIF25-AS1      |
| 89  | 211445_x_at | NR_002182 | NACAP1        |                     |                |
| 90  | 211457_at   | NR_028287 | GABARAPL3     |                     |                |
| 91  | 211614_at   |           |               | ENSG00000254488     | AC007876.1     |
| 92  | 211718_at   | NR_026877 | MGC2889       |                     |                |
| 93  | 211775_x_at |           |               | ENSG00000255384     | AP001267.2     |
| 94  | 212203_x_at |           |               | ENSG00000270105     | AC136475.8     |
| 95  | 212337_at   | NR_002323 | TUG1          |                     |                |
| 96  | 212433_x_at |           |               | ENSG00000235979     | AC004448.4     |
| 97  | 212680_x_at |           |               | ENSG00000257086     | AP001453.3     |
| 98  | 212725_s_at | NR_002323 | TUG1          |                     |                |
| 99  | 212732_at   | NR_002766 | MEG3          | ENSG00000214548     | MEG3           |
| 100 | 212788_x_at |           |               | ENSG00000267898     | AC026803.2     |
| 101 | 212868_x_at |           |               | ENSG00000234608     | MAPKAPK5-AS1   |
| 102 | 212957_s_at | NR_015353 | LOC92249      |                     |                |
| 103 | 213089_at   | NR_027439 | LOC100272216  |                     |                |
| 104 | 213187_x_at |           |               | ENSG00000267898     | AC026803.2     |
| 105 | 213220_at   | NR_015402 | NCRNA00081    |                     |                |
| 106 | 213224_s_at | NR_015402 | NCRNA00081    |                     |                |
| 107 | 213248_at   | NR_024403 | LOC730101     |                     |                |
| 108 | 213363_at   | NR_026551 | CA5BP         |                     |                |
| 109 | 213367_at   | NR_015357 | ZNF783        |                     |                |
| 110 | 213380_x_at | NR_002729 | MST1P9        |                     |                |
| 111 | 213502_x_at | NR_024448 | LOC91316      |                     |                |
| 112 | 213510_x_at | NR_003554 | LOC220594     |                     |                |
| 113 | 213546_at   | NR_002186 | DKFZP586I1420 |                     |                |
| 114 | 213557_at   |           |               | ENSG00000273576     | AC009283.1     |
| 115 | 213569_at   |           |               | ENSG00000258301     | VASH1-AS1      |
| 116 | 213703_at   |           |               | ENSG00000232931     | LINC00342      |
| 117 | 213737_x_at |           |               | ENSG00000269930 /// | AC091057.2 /// |

|     |             |           |                     |                 |
|-----|-------------|-----------|---------------------|-----------------|
| 118 | 213762_x_at |           | ENSG00000225489     | AL354707.1      |
| 119 | 213776_at   |           | ENSG00000261087     | AP003469.4      |
| 120 | 213821_s_at |           | ENSG00000238039     | AC244197.2      |
| 121 | 213840_s_at |           | ENSG00000269486 /// | AC011455.2 ///  |
| 122 | 213972_at   |           | ENSG00000247993     | FOXD1-AS1       |
| 123 | 214077_x_at | NR_002211 | MEIS3P1             |                 |
| 124 | 214110_s_at |           | ENSG00000283196     | AC006453.2      |
| 125 | 214120_at   | NR_002727 | RFPL1S              |                 |
| 126 | 214123_s_at | NR_015453 | C4orf10             |                 |
| 127 | 214186_s_at | NR_002812 | HCG26               |                 |
| 128 | 214218_s_at | NR_001564 | XIST                | ENSG00000229807 |
| 129 | 214340_at   | NR_002710 | ALOX12P2            | XIST            |
| 130 | 214344_at   | NR_024006 | LOC92973            |                 |
| 131 | 214381_at   | NR_003034 | LOC441601           |                 |
| 132 | 214409_at   | NR_001450 | RFPL3S              |                 |
| 133 | 214526_x_at | NR_003613 | PMS2L1              |                 |
| 134 | 214561_at   | NR_003061 | LILRP2              |                 |
| 135 | 214657_s_at | NR_002802 | NEAT1               | ENSG00000245532 |
| 136 | 214685_at   | NR_015453 | C4orf10             | NEAT1           |
| 137 | 214696_at   |           | ENSG00000186594 /// | MIR22HG         |
| 138 | 214717_at   |           | ENSG00000260804     | LINC01963       |
| 139 | 214756_x_at | NR_003613 | PMS2L1              |                 |
| 140 | 214757_at   | NR_003614 | PMS2L2              |                 |
| 141 | 214823_at   | NR_002722 | ZNF204P             |                 |
| 142 | 214834_at   | NR_022008 | PAR5                |                 |
| 143 | 214839_at   | NR_024281 | LOC157627           | ENSG00000253230 |
| 144 | 214850_at   | NR_024054 | LOC100170939        | LINC00599       |
| 145 | 214857_at   |           | ENSG00000269609     | RPARP-AS1       |
| 146 | 214858_at   | NR_024014 | PP14571             |                 |
| 147 | 214983_at   | NR_001545 | TTY15               | ENSG00000233864 |
| 148 | 215003_at   | NR_024159 | DGCR9               | ENSG00000273032 |
| 149 | 215011_at   | NR_002909 | SNHG3               | DGCR9           |
| 150 | 215039_at   |           | ENSG00000267272     | LINC01140       |
| 151 | 215057_at   | NR_027456 | LOC100272228        |                 |
| 152 | 215105_at   | NR_026928 | CG030               |                 |
| 153 | 215110_at   | NR_002724 | MBL1P               |                 |
| 154 | 215118_s_at |           | ENSG00000282474     | AL928768.1      |
| 155 | 215141_at   | NR_015453 | C4orf10             |                 |
| 156 | 215143_at   | NR_003561 | DPY19L2P2           |                 |
| 157 | 215174_at   | NR_002601 | FMO6P               |                 |
| 158 | 215180_at   |           | ENSG00000261478     | AC013391.3      |
| 159 | 215185_at   |           | ENSG00000204054     | LINC00963       |

|     |             |           |              |                     |                |
|-----|-------------|-----------|--------------|---------------------|----------------|
| 160 | 215187_at   |           |              | ENSG00000233828     | LINC01949      |
| 161 | 215192_at   | NR_022007 | PMS2L4       |                     |                |
| 162 | 215196_at   | NR_024448 | LOC91316     |                     |                |
| 163 | 215202_at   | NR_024448 | LOC91316     |                     |                |
| 164 | 215211_at   | NR_003370 | RRN3P1       | ENSG00000260973 /// | AC009021.2 /// |
| 165 | 215224_at   | NR_002576 | SNORA21      |                     |                |
| 166 | 215229_at   |           |              | ENSG00000259577     | CERNA1         |
| 167 | 215244_at   | NR_002733 | DGCR5        |                     |                |
| 168 | 215283_at   | NR_015389 | LOC339290    | ENSG00000263753     | LINC00667      |
| 169 | 215288_at   | NR_002720 | TRPC2        |                     |                |
| 170 | 215297_at   | NR_015364 | hCG_2009921  |                     |                |
| 171 | 215298_at   |           |              | ENSG00000251632     | LINC02172      |
| 172 | 215358_x_at | NR_026777 | ZNF37B       |                     |                |
| 173 | 215395_x_at | NR_001296 | TRY6         |                     |                |
| 174 | 215412_x_at | NR_003614 | PMS2L2       |                     |                |
| 175 | 215421_at   |           |              | ENSG00000235072     | AC012074.1     |
| 176 | 215456_at   |           |              | ENSG00000274331     | AL355974.1     |
| 177 | 215487_x_at | NR_026714 | FAM182B      |                     |                |
| 178 | 215502_at   |           |              | ENSG00000260532     | AL031598.1     |
| 179 | 215513_at   | NR_002768 | HYMAI        |                     |                |
| 180 | 215514_at   |           |              | ENSG00000273487     | AC104836.2     |
| 181 | 215536_at   | NR_003937 | HLA-DQB2     |                     |                |
| 182 | 215563_s_at | NR_002729 | MST1P9       |                     |                |
| 183 | 215590_x_at | NR_028389 | LOC100128640 |                     |                |
| 184 | 215627_at   |           |              | ENSG00000234350     | AC007405.1     |
| 185 | 215670_s_at | NR_003654 | SCAND2       |                     |                |
| 186 | 215679_at   |           |              | ENSG00000278090     | AC036108.4     |
| 187 | 215683_at   |           |              | ENSG00000261126     | RBFADN         |
| 188 | 215725_at   | NR_024157 | DGCR11       |                     |                |
| 189 | 215738_at   |           |              | ENSG00000261097     | LINC00563      |
| 190 | 215756_at   |           |              | ENSG00000233791     | LINC01136      |
| 191 | 215801_at   |           |              | ENSG00000257310     | AL589743.1     |
| 192 | 215809_at   |           |              | ENSG00000232710     | AC254562.2     |
| 193 | 215825_at   |           |              | ENSG00000260743     | AC007823.1     |
| 194 | 215827_x_at | NR_023386 | CROCCL2      |                     |                |
| 195 | 215872_at   |           |              | ENSG00000258517     | AC004817.1     |
| 196 | 215920_s_at |           |              | ENSG00000267143     | AP001120.2     |
| 197 | 215929_at   |           |              | ENSG00000235824     | LINC00837      |
| 198 | 215944_at   |           |              | ENSG00000236268     | LINC01361      |
| 199 | 215966_x_at | NR_026575 | GK3P         |                     |                |
| 200 | 215970_at   | NR_027247 | LOC100130331 |                     |                |
| 201 | 215972_at   | NR_024617 | PART1        | ENSG00000152931     | PART1          |

|     |             |           |             |                     |                |
|-----|-------------|-----------|-------------|---------------------|----------------|
| 202 | 215973_at   | NR_001317 | HCG4P6      |                     |                |
| 203 | 215981_at   |           |             | ENSG00000246863     | AC012377.1     |
| 204 | 216051_x_at | NR_023388 | PRINS       |                     |                |
| 205 | 216053_x_at | NR_026713 | FAM182A     | ENSG00000125804     | FAM182A        |
| 206 | 216063_at   | NR_001589 | HBBP1       |                     |                |
| 207 | 216084_at   | NR_024481 | C9orf144    |                     |                |
| 208 | 216099_at   | NR_002774 | HTR7P       |                     |                |
| 209 | 216106_at   |           |             | ENSG00000260619     | AC068870.1     |
| 210 | 216126_at   | NR_026956 | LOC284440   |                     |                |
| 211 | 216149_at   | NR_015341 | LRRC37B2    |                     |                |
| 212 | 216188_at   | NR_026766 | MYCNOS      |                     |                |
| 213 | 216209_at   |           |             | ENSG00000249267     | LINC00939      |
| 214 | 216227_at   | NR_001318 | HCG2P7      |                     |                |
| 215 | 216229_x_at | NR_001318 | HCG2P7      |                     |                |
| 216 | 216240_at   | NR_003367 | PVT1        | ENSG00000249859     | PVT1           |
| 217 | 216249_at   | NR_003367 | PVT1        |                     |                |
| 218 | 216276_s_at | NR_001569 | ADAM3A      |                     |                |
| 219 | 216313_at   | NR_001280 | PCDHB17     |                     |                |
| 220 | 216319_at   |           |             | ENSG00000236673     | AL117378.1     |
| 221 | 216355_at   | NR_001280 | PCDHB17     |                     |                |
| 222 | 216395_at   |           |             | ENSG00000230733     | AC092171.2     |
| 223 | 216404_at   | NR_002717 | ATXN8OS     |                     |                |
| 224 | 216428_x_at | NR_026716 | KIR3DX1     |                     |                |
| 225 | 216473_x_at |           |             | ENSG00000281591     | DBET           |
| 226 | 216492_at   | NR_026716 | KIR3DX1     |                     |                |
| 227 | 216544_at   | NR_002193 | RBMV2FP     |                     |                |
| 228 | 216548_x_at | NR_002165 | HMGB3L1     |                     |                |
| 229 | 216596_at   | NR_026771 | DKFZP434L18 | ENSG00000225930 /// | LINC02249      |
| 230 | 216601_at   | NR_002773 | LOC90586    |                     |                |
| 231 | 216606_x_at | NR_001444 | LYPLA2P1    |                     |                |
| 232 | 216608_at   | NR_026964 | LOC26102    |                     |                |
| 233 | 216636_at   |           |             | ENSG00000254166     | CASC19         |
| 234 | 216664_at   |           |             | ENSG00000236951 /// | AC007359.1 /// |
| 235 | 216665_s_at | NR_001536 | TTY2        | ENSG00000212855 /// | TTY2 ///       |
| 236 | 216666_at   | NR_003715 | LOC93432    |                     |                |
| 237 | 216673_at   |           |             | ENSG00000129845 /// | TTY1 ///       |
| 238 | 216675_at   |           |             | ENSG00000179082     | C9orf106       |
| 239 | 216686_at   | NR_015424 | FLJ40330    |                     |                |
| 240 | 216722_at   | NR_001559 | VENTXP1     | ENSG00000259849     | VENTXP1        |
| 241 | 216726_at   | NR_001559 | VENTXP1     |                     |                |
| 242 | 216786_at   | NR_002161 | NCRNA00230  | ENSG00000233522 /// | FAM224A ///    |

|     |             |           |              |                     |                            |
|-----|-------------|-----------|--------------|---------------------|----------------------------|
| 243 | 216838_at   | NR_015353 | LOC92249     |                     |                            |
| 244 | 216843_x_at | NR_003613 | PMS2L1       |                     |                            |
| 245 | 216849_at   |           |              | ENSG00000235725     | AC007389.3                 |
| 246 | 216856_s_at | NR_002612 | DLEU2        |                     |                            |
| 247 | 216870_x_at | NR_002612 | DLEU2        |                     |                            |
| 248 | 216874_at   |           |              | ENSG00000226674     | TEX41                      |
| 249 | 216908_x_at | NR_003370 | RRN3P1       |                     |                            |
| 250 | 216935_at   |           |              | ENSG00000176075     | LINC00302                  |
| 251 | 216998_s_at | NR_001448 | ADAM5P       |                     |                            |
| 252 | 217003_s_at | NR_001448 | ADAM5P       |                     |                            |
| 253 | 217090_at   | NR_001569 | ADAM3A       |                     |                            |
| 254 | 217115_at   | NR_026640 | LOC100240726 |                     |                            |
| 255 | 217123_x_at | NR_003921 | PMCHL1       |                     |                            |
| 256 | 217126_at   |           |              | ENSG00000274281     | AC022929.2                 |
| 257 | 217158_at   |           |              | ENSG00000275450     | PTGER4P2-CDK2AP2P2         |
| 258 | 217219_at   | NR_026964 | LOC26102     | ENSG00000262075     | DKFZP434A062               |
| 259 | 217261_at   |           |              | ENSG00000212855 /// | TTY2 ///<br>TTY2B          |
| 260 | 217308_at   | NR_002169 | OR1F2P       |                     |                            |
| 261 | 217323_at   | NR_001298 | HLA-DRB6     |                     |                            |
| 262 | 217332_at   | NR_027466 | RP11-159J2.1 |                     |                            |
| 263 | 217342_x_at |           |              | ENSG00000233828     | LINC01949                  |
| 264 | 217362_x_at | NR_001298 | HLA-DRB6     |                     |                            |
| 265 | 217406_at   |           |              | ENSG00000230736 /// | AL021937.1 ///<br>AL021937 |
| 266 | 217436_x_at | NR_024240 | HLA-J        |                     |                            |
| 267 | 217443_at   |           |              | ENSG00000246777     | AC044802.1                 |
| 268 | 217449_at   |           |              | ENSG00000248103     | AC008443.3                 |
| 269 | 217453_at   |           |              | ENSG00000241317     | AL133481.3                 |
| 270 | 217466_x_at |           |              | ENSG00000235979     | AC004448.4                 |
| 271 | 217471_at   |           |              | ENSG00000267659     | LINC01482                  |
| 272 | 217481_x_at |           |              | ENSG00000264727     | AC005725.1                 |
| 273 | 217485_x_at | NR_003613 | PMS2L1       |                     |                            |
| 274 | 217506_at   | NR_015389 | LOC339290    | ENSG00000263753     | LINC00667                  |
| 275 | 217625_x_at |           |              | ENSG00000204054     | LINC00963                  |
| 276 | 217667_at   | NR_026952 | LOC729799    |                     |                            |
| 277 | 217704_x_at | NR_024187 | SUZ12P       |                     |                            |
| 278 | 218624_s_at | NR_026052 | MGC2752      |                     |                            |
| 279 | 218681_s_at |           |              | ENSG00000273342     | AP000553.2                 |
| 280 | 218820_at   | NR_023938 | C14orf132    |                     |                            |
| 281 | 219139_s_at | NR_023386 | CROCCL2      |                     |                            |
| 282 | 219173_at   | NR_003587 | MYO15B       |                     |                            |
| 283 | 219211_at   |           |              | ENSG00000278044     | AC023490.3                 |
| 284 | 219253_at   | NR_000034 | TMEM185B     |                     |                            |

|     |             |           |            |                     |               |
|-----|-------------|-----------|------------|---------------------|---------------|
| 285 | 219376_at   |           |            | ENSG00000242375     | AL590705.3    |
| 286 | 219442_at   | NR_024034 | C16orf67   | ENSG00000276867     | AC074050.4    |
| 287 | 219563_at   | NR_026779 | C14orf139  |                     |               |
| 288 | 219791_s_at | NR_003679 | NBLA00301  |                     |               |
| 289 | 219817_at   | NR_015404 | C12orf47   | ENSG00000234608     | MAPKAPK5-AS1  |
| 290 | 219839_x_at |           |            | ENSG00000187621     | TCL6          |
| 291 | 219865_at   | NR_023918 | HSPC157    |                     |               |
| 292 | 219871_at   | NR_026804 | FLJ13197   |                     |               |
| 293 | 220159_at   | NR_002451 | ABCA11P    |                     |               |
| 294 | 220209_at   | NR_003064 | PYY2       |                     |               |
| 295 | 220211_at   | NR_026806 | FLJ13224   |                     |               |
| 296 | 220220_at   | NR_002940 | LRRC37A4   |                     |               |
| 297 | 220222_at   | NR_027259 | C8orf39    |                     |               |
| 298 | 220244_at   | NR_024065 | LOH3CR2A   |                     |               |
| 299 | 220263_at   | NR_026763 | SMAD5OS    |                     |               |
| 300 | 220324_at   | NR_026807 | C6orf155   | ENSG00000233237     | LINC00472     |
| 301 | 220352_x_at | NR_024492 | FLJ42627   |                     |               |
| 302 | 220364_at   | NR_027706 | FLJ11235   | ENSG00000278921     | EPB41L4A-AS2  |
| 303 | 220377_at   |           |            | ENSG00000226777 /// | FAM30A        |
| 304 | 220388_at   | NR_024377 | FER1L4     |                     |               |
| 305 | 220399_at   | NR_024321 | NCRNA00115 | ENSG00000225880     | LINC00115     |
| 306 | 220427_at   |           |            | ENSG00000227403     | LINC01806     |
| 307 | 220449_at   |           |            | ENSG00000132832 /// | LINC01260 /// |
| 308 | 220459_at   | NR_002776 | MCM3APAS   |                     | AL139352      |
| 309 | 220465_at   | NR_026887 | LOC80054   |                     |               |
| 310 | 220479_at   | NR_002763 | LOC29034   |                     |               |
| 311 | 220505_at   | NR_024274 | C9orf53    | ENSG00000224854     | CDKN2A-AS1    |
| 312 | 220506_at   | NR_003923 | GUCY1B2    |                     |               |
| 313 | 220530_at   | NR_002767 | NCRNA00120 |                     |               |
| 314 | 220572_at   |           |            | ENSG00000247137     | AP000873.2    |
| 315 | 220575_at   | NR_026809 | FAM106A    |                     |               |
| 316 | 220577_at   | NR_003945 | GVIN1      |                     |               |
| 317 | 220609_at   | NR_026921 | LOC202181  |                     |               |
| 318 | 220629_at   | NR_024627 | KCNQ1DN    |                     |               |
| 319 | 220654_at   | NR_002181 | PPY2       |                     |               |
| 320 | 220660_at   | NR_024032 | C9orf27    | ENSG00000204148     | LINC00474     |
| 321 | 220664_at   | NR_003062 | SPRR2C     |                     |               |
| 322 | 220678_at   |           |            | ENSG00000173862     | AC008080.1    |
| 323 | 220694_at   | NR_002765 | ASAP1IT1   |                     |               |
| 324 | 220698_at   |           |            | ENSG00000268941     | LINC01711     |
| 325 | 220701_at   |           |            | ENSG00000279636     | LINC00216     |
| 326 | 220703_at   | NR_024628 | C10orf110  |                     |               |



|     |             |           |              |                     |                |
|-----|-------------|-----------|--------------|---------------------|----------------|
| 327 | 220710_at   | NR_026808 | C15orf28     |                     |                |
| 328 | 220718_at   | NR_027262 | C15orf34     |                     |                |
| 329 | 220747_at   | NR_026883 | HSPC072      | ENSG00000179935     | LINC00652      |
| 330 | 220771_at   |           |              | ENSG00000278932     | CR381653.1     |
| 331 | 220772_at   | NR_026783 | BPESC1       | ENSG00000232416     | BPESC1         |
| 332 | 220810_at   | NR_024604 | CLCA3P       |                     |                |
| 333 | 220828_s_at |           |              | ENSG00000233828     | LINC01949      |
| 334 | 220849_at   |           |              | ENSG00000281856 /// | AC106017.2 /// |
| 335 | 220852_at   | NR_024620 | PRO1768      |                     |                |
| 336 | 220887_at   | NR_024630 | C14orf162    |                     |                |
| 337 | 220904_at   | NR_026780 | C6orf208     | ENSG00000231690 /// | LINC00574      |
| 338 | 220918_at   | NR_026812 | C21orf96     |                     |                |
| 339 | 220983_s_at |           |              | ENSG00000245532     | NEAT1          |
| 340 | 221054_s_at |           |              | ENSG00000187621     | TCL6           |
| 341 | 221058_s_at |           |              | ENSG00000261519     | AC010542.4     |
| 342 | 221093_at   | NR_002730 | BRD7P3       |                     |                |
| 343 | 221109_at   |           |              | ENSG00000276255     | AL136379.1     |
| 344 | 221129_at   | NR_026770 | C17orf88     | ENSG00000267496     | FAM215A        |
| 345 | 221148_at   |           |              | ENSG00000260550     | AC136618.1     |
| 346 | 221186_at   | NR_027434 | LOC100131532 |                     |                |
| 347 | 221338_at   | NR_003673 | LY6G6E       |                     |                |
| 348 | 221393_at   | NR_028511 | TAAR3        |                     |                |
| 349 | 221419_s_at |           |              | ENSG00000280800 /// | FP671120.3 /// |
| 350 | 221422_s_at | NR_026677 | C9orf45      |                     |                |
| 351 | 221621_at   | NR_027058 | C17orf86     | ENSG00000234912     | SNHG20         |
| 352 | 221624_at   |           |              | ENSG00000187621     | TCL6           |
| 353 | 221634_at   | NR_000029 | RPL23AP7     |                     |                |
| 354 | 221714_s_at | NR_003370 | RRN3P1       |                     |                |
| 355 | 221728_x_at | NR_001564 | XIST         | ENSG00000229807     | XIST           |
| 356 | 221847_at   |           |              | ENSG00000281930     | SMIM10L1       |
| 357 | 221876_at   | NR_015357 | ZNF783       |                     |                |
| 358 | 221944_at   | NR_024492 | FLJ42627     |                     |                |
| 359 | 221973_at   |           |              | ENSG00000277701 /// | AC159540.2 /// |
| 360 | 221974_at   | NR_023915 | IPW          |                     |                |
| 361 | 222001_x_at | NR_024510 | LOC728855    | ENSG00000277147 /// | LINC00869 ///  |
| 362 | 222021_x_at | NR_003264 | SDHAP1       | ENSG00000242086 /// | LINC00969      |
| 363 | 222054_at   | NR_003929 | LOC728448    |                     |                |
| 364 | 222087_at   | NR_003367 | PVT1         |                     |                |
| 365 | 222090_at   | NR_024454 | LOC100134713 |                     |                |
| 366 | 222096_x_at |           |              | ENSG00000229697 /// | AL391987.3 /// |
| 367 | 222177_s_at | NR_003654 | SCAND2       |                     |                |
| 368 | 222184_at   |           |              | ENSG00000270074     | AC087203.3     |

|     |             |           |              |                     |                        |
|-----|-------------|-----------|--------------|---------------------|------------------------|
| 369 | 222194_at   | NR_027425 | FAM66D       |                     |                        |
| 370 | 222196_at   |           |              | ENSG00000234449 /// | FAM239A /// FAM239B /  |
| 371 | 222198_at   |           |              | ENSG00000260588     | AC027702.1             |
| 372 | 222205_x_at | NR_026714 | FAM182B      |                     |                        |
| 373 | 222208_s_at | NR_003655 | POLR2J4      |                     |                        |
| 374 | 222211_x_at | NR_003654 | SCAND2       |                     |                        |
| 375 | 222225_at   | NR_003572 | RPL23AP53    |                     |                        |
| 376 | 222226_at   | NR_026576 | SAA3P        |                     |                        |
| 377 | 222243_s_at |           |              | ENSG00000268568     | AC007228.2             |
| 378 | 222244_s_at | NR_002323 | TUG1         |                     |                        |
| 379 | 222245_s_at | NR_024377 | FER1L4       |                     |                        |
| 380 | 222253_s_at | NR_003714 | POM121L9P    | ENSG00000197210     | AP000550.1             |
| 381 | 222274_at   | NR_003950 | ZDHHC8P1     |                     |                        |
| 382 | 222279_at   | NR_026972 | RP3-377H14.5 |                     |                        |
| 383 | 222295_x_at |           |              | ENSG00000281005     | LINC00921              |
| 384 | 222305_at   |           |              | ENSG00000272711     | AC019069.1             |
| 385 | 222307_at   | NR_026932 | LOC282997    |                     |                        |
| 386 | 222314_x_at | NR_004428 | EGOT         |                     |                        |
| 387 | 222327_x_at | NR_002171 | OR7E156P     |                     |                        |
| 388 | 222328_x_at | NR_002766 | MEG3         |                     |                        |
| 389 | 222349_x_at | NR_002818 | RNF126P1     |                     |                        |
| 390 | 222361_at   | NR_027156 | TUBBP5       |                     |                        |
| 391 | 222376_at   |           |              | ENSG00000248161     | AC098487.1             |
| 392 | 222384_at   |           |              | ENSG00000232860     | SMG7-AS1               |
| 393 | 59375_at    | NR_003587 | MYO15B       |                     |                        |
| 394 | 59433_at    |           |              | ENSG00000205664 /// | BX890604.1 /// FAM239A |
| 395 | 60815_at    | NR_003655 | POLR2J4      |                     |                        |
| 396 | 64432_at    | NR_015404 | C12orf47     | ENSG00000234608     | MAPKAPK5-AS1           |
| 397 | 65588_at    | NR_015366 | LOC388796    | ENSG00000196756     | SNHG17                 |
| 398 | 78495_at    | NR_015357 | ZNF783       |                     |                        |

**Table S2 lncRNAs shared by Refseq and Ensembl annotations**

| No. Probesets | Refseq Transcript ID | Gene Symbol | Ensembl Gene ID | Ensembl Gene Symbol |            |
|---------------|----------------------|-------------|-----------------|---------------------|------------|
| 1             | 205677_s_at          | NR_002605   | DLEU1           | ENSG00000176124     | DLEU1      |
| 2             | 205833_s_at          | NR_024617   | PART1           | ENSG00000152931     | PART1      |
| 3             | 205834_s_at          | NR_024617   | PART1           | ENSG00000152931     | PART1      |
| 4             | 206478_at            | NR_026800   | KIAA0125        | ENSG00000226777 /// | FAM30A     |
| 5             | 206819_at            | NR_003714   | POM121L9P       | ENSG00000197210     | AP000550.1 |
| 6             | 207063_at            | NR_001544   | NCRNA00185      | ENSG00000176728     | TTY14      |
| 7             | 207161_at            | NR_022006   | KIAA0087        | ENSG00000122548     | KIAA0087   |
| 8             | 207259_at            | NR_024626   | C17orf73        | ENSG00000167117     | LINC00483  |

|    |             |           |             |                     |                |
|----|-------------|-----------|-------------|---------------------|----------------|
| 9  | 207698_at   | NR_026773 | C6orf123    | ENSG00000146521     | LINC01558      |
| 10 | 209917_s_at | NR_015381 | TP53TG1     | ENSG00000182165     | TP53TG1        |
| 11 | 210241_s_at | NR_015381 | TP53TG1     | ENSG00000182165     | TP53TG1        |
| 12 | 210464_at   | NR_026772 | C8orf71     | ENSG00000215117 /// | LINC00588      |
| 13 | 210794_s_at | NR_002766 | MEG3        | ENSG00000214548     | MEG3           |
| 14 | 210886_x_at | NR_015381 | TP53TG1     | ENSG00000182165     | TP53TG1        |
| 15 | 212732_at   | NR_002766 | MEG3        | ENSG00000214548     | MEG3           |
| 16 | 214218_s_at | NR_001564 | XIST        | ENSG00000229807     | XIST           |
| 17 | 214657_s_at | NR_002802 | NEAT1       | ENSG00000245532     | NEAT1          |
| 18 | 214839_at   | NR_024281 | LOC157627   | ENSG00000253230     | LINC00599      |
| 19 | 214983_at   | NR_001545 | TTY15       | ENSG00000233864     | TTY15          |
| 20 | 215003_at   | NR_024159 | DGCR9       | ENSG00000273032     | DGCR9          |
| 21 | 215211_at   | NR_003370 | RRN3P1      | ENSG00000260973 /// | AC009021.2 /// |
| 22 | 215283_at   | NR_015389 | LOC339290   | ENSG00000263753     | LINC00667      |
| 23 | 215972_at   | NR_024617 | PART1       | ENSG00000152931     | PART1          |
| 24 | 216053_x_at | NR_026713 | FAM182A     | ENSG00000125804     | FAM182A        |
| 25 | 216240_at   | NR_003367 | PVT1        | ENSG00000249859     | PVT1           |
| 26 | 216596_at   | NR_026771 | DKFZP434L18 | ENSG00000225930 /// | LINC02249      |
| 27 | 216665_s_at | NR_001536 | TTY2        | ENSG00000212855 /// | TTY2 ///       |
| 28 | 216722_at   | NR_001559 | VENTXP1     | ENSG00000259849     | VENTXP1        |
| 29 | 216786_at   | NR_002161 | NCRNA00230  | ENSG00000233522 /// | FAM224A ///    |
| 30 | 217219_at   | NR_026964 | LOC26102    | ENSG00000262075     | DKFZP434A062   |
| 31 | 217506_at   | NR_015389 | LOC339290   | ENSG00000263753     | LINC00667      |
| 32 | 219442_at   | NR_024034 | C16orf67    | ENSG00000276867     | AC074050.4     |
| 33 | 219817_at   | NR_015404 | C12orf47    | ENSG00000234608     | MAPKAPK5-AS1   |
| 34 | 220324_at   | NR_026807 | C6orf155    | ENSG00000233237     | LINC00472      |
| 35 | 220364_at   | NR_027706 | FLJ11235    | ENSG00000278921     | EPB41L4A-AS2   |
| 36 | 220399_at   | NR_024321 | NCRNA00115  | ENSG00000225880     | LINC00115      |
| 37 | 220505_at   | NR_024274 | C9orf53     | ENSG00000224854     | CDKN2A-AS1     |
| 38 | 220660_at   | NR_024032 | C9orf27     | ENSG00000204148     | LINC00474      |
| 39 | 220747_at   | NR_026883 | HSPC072     | ENSG00000179935     | LINC00652      |
| 40 | 220772_at   | NR_026783 | BPESC1      | ENSG00000232416     | BPESC1         |
| 41 | 220904_at   | NR_026780 | C6orf208    | ENSG00000231690 /// | LINC00574      |
| 42 | 221129_at   | NR_026770 | C17orf88    | ENSG00000267496     | FAM215A        |
| 43 | 221621_at   | NR_027058 | C17orf86    | ENSG00000234912     | SNHG20         |
| 44 | 221728_x_at | NR_001564 | XIST        | ENSG00000229807     | XIST           |
| 45 | 222001_x_at | NR_024510 | LOC728855   | ENSG00000277147 /// | LINC00869 ///  |
| 46 | 222021_x_at | NR_003264 | SDHAP1      | ENSG00000242086 /// | LINC00969      |
| 47 | 222253_s_at | NR_003714 | POM121L9P   | ENSG00000197210     | AP000550.1     |
| 48 | 64432_at    | NR_015404 | C12orf47    | ENSG00000234608     | MAPKAPK5-AS1   |
| 49 | 65588_at    | NR_015366 | LOC388796   | ENSG00000196756     | SNHG17         |
